# Supplementary material for: Atg18 phosphoregulation controls organellar dynamics by modulating its phosphoinositide-binding activity
Source: PubMed Central journal article supplement — J Cell Biol. 2013 Aug 19;202(4):685–98. doi: 10.1083/jcb.201302067 (PMC3747300; doi:10.1083/jcb.201302067), 2013-08-19
Supplement: supp_jcb.201302067_JCB_201302067_sm.pdf [file supp_jcb.201302067_JCB_201302067_sm.pdf]

Tamura et al., <http://www.jcb.org/cgi/content/full/jcb.201302067/DC1>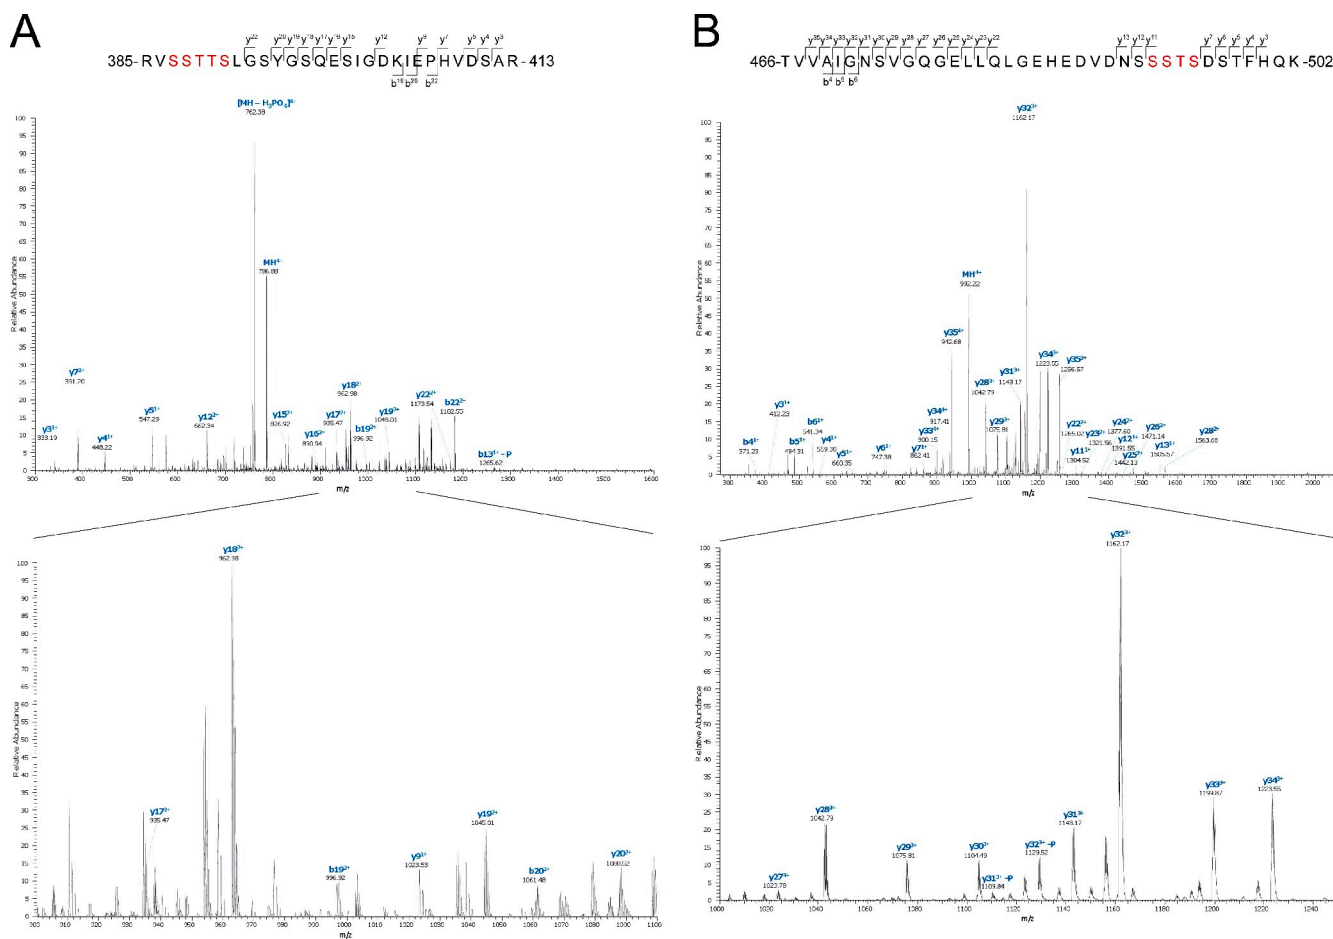

Figure S1. Identification of phosphorylated regions by LC-MS/MS. To identify the phosphorylation sites on PpAtg18, the GST-fused protein was purified from *P. pastoris* and was analyzed by LC-MS/MS. The MS analysis covered 85% of the total PpAtg18 protein, and identified two monophosphorylated peptides, one corresponding to 385-RVSSSTTSLGSGYGSQESIGDKIEPHVDSAR-413 (A) and the other to 466-TVVAIGNSVGQGELLQLGHEHEDVDNNSSTSDSTFHQK-502 (B). Both peptides possess nine Ser/Thr residues. These two peptides were then subjected to targeted MS/MS analysis, which identified 387-SSTTS-391 and 492-SSTTS-495 as the phosphorylated regions in peptides A and B, respectively although the phosphorylated residue in these two regions could not be determined.

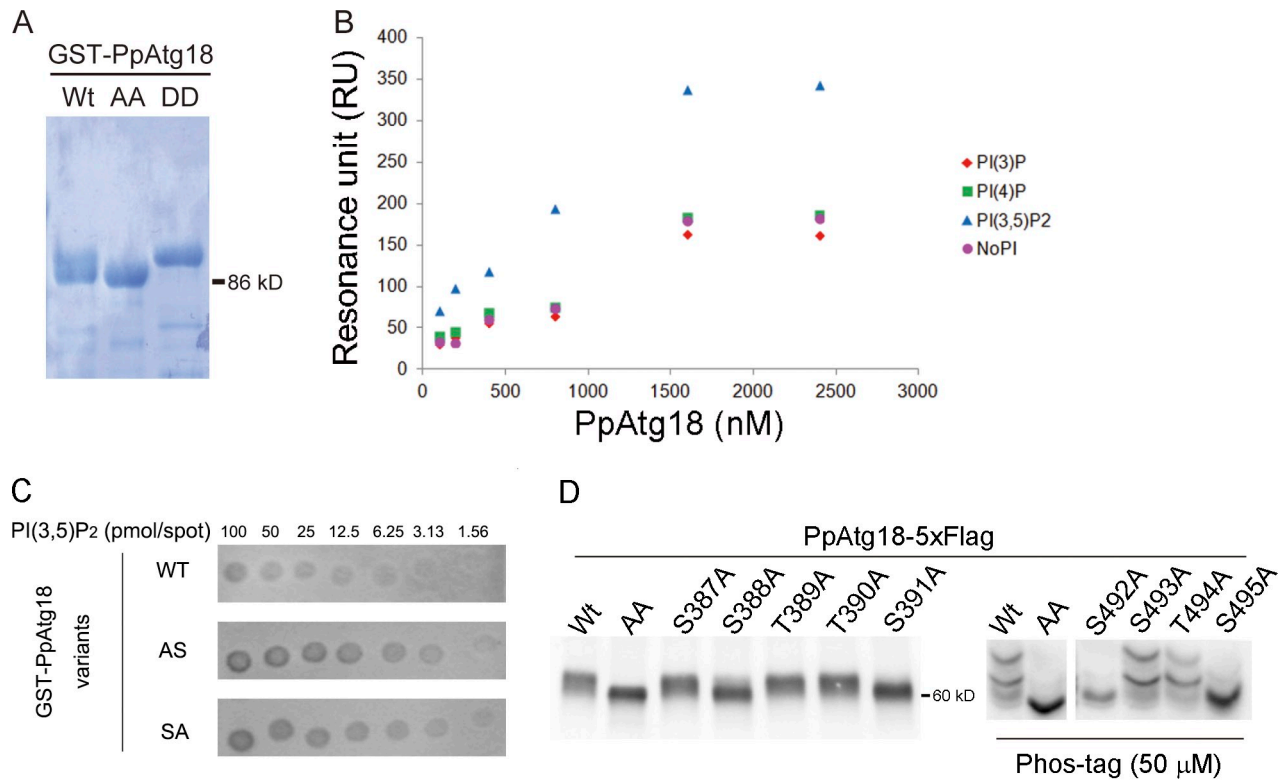

Figure S2. **Purification of PpAtg18 proteins from *P. pastoris*.** (A) SDS-PAGE of purified GST-PpAtg18 variants. The gel was stained with CBB. These proteins were purified as well as GST-PpAtg18Wt. An equal mole of each sample was applied to the gel. (B) Surface plasmon analysis. The interaction between PpAtg18 and liposomes was assessed by a Biacore system set L1 sensor chip (GE Healthcare). For surface plasmon, PpAtg18 was eluted from a GS 4B column with PreScission protease (GE Healthcare). (C) PI(3,5)P<sub>2</sub>-binding activity of PpAtg18 SA and PpAtg18 AS proteins. The designated PpAtg18 variants fused to GST were incubated at a concentration of 1 μg/ml with nitrocellulose membrane onto which PI(3,5)P<sub>2</sub> was spotted with the same concentration gradient as PIP Array. (D) Identification of amino acid residues critical for phosphorylation of PpAtg18. Experiments were performed as described in Fig. 3 (A and B).

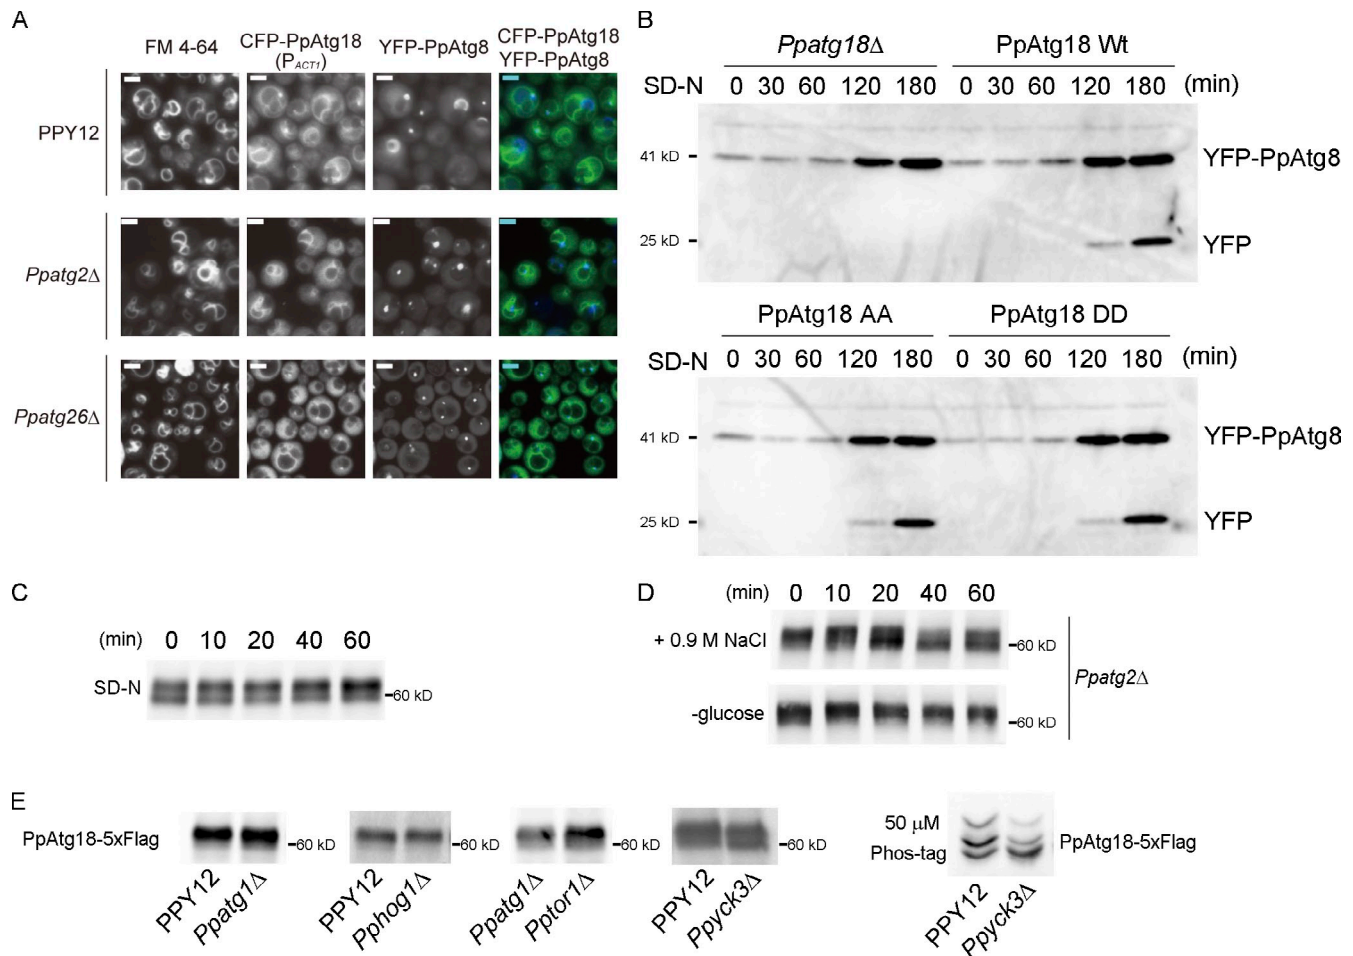

Figure S3. **Role of PpAtg18 in autophagic pathways.** (A) Colocalization of PpAtg18 and PpAtg8. In this experiment, PpAtg18-tagged CFP at the N terminus was expressed under the *PpACT1* promoter. Each strain was transferred from methanol medium to glucose medium for 30–60 min. Vacuoles were stained with FM 4-64. Bars, 2  $\mu$ m. (B) YFP-PpAtg8 procession assay during nitrogen starvation in PpAtg18 AA and DD mutant strains. This procession experiment was referred from a previous report (Yamashita et al., 2009). Cells grown in SD were shifted to SD-N medium and collected at indicated time point. These blots were incubated with anti-GFP monoclonal antibody (Molecular Probes). (C) Western blotting of PpAtg18-5xFlag under nitrogen starvation. Cells grown on SD were shifted to SD-N. (D) Western blotting of PpAtg18-5xFlag in *Ppatg2Δ* cells. Cells grown on SD medium were shifted to SD-glucose or SD + 0.9 M NaCl similar to Fig. 4 A. (E) Western blotting of PpAtg18-5xFlag with a Phos-tag in *Ppyck3Δ*. Cell lysates were obtained from SD culture of the designated strains harboring PpAtg18-5xFLAG, and were subjected to immunoblot analysis as described in Fig. 3 A.

Table S1. Yeast strains used in this study

| Designation | Description                             | Genotype                                     | Reference              |
|-------------|-----------------------------------------|----------------------------------------------|------------------------|
| PPY12       | Wild type                               | <i>arg4 his4</i>                             | Sakai et al., 1998     |
| SMD1163     | <i>pep4Δ prbΔ</i>                       | <i>arg4::Δpep4 prb his4</i>                  | Tuttle and Dunn, 1995  |
| NTP0101     | <i>atg1Δ</i>                            | <i>Δatg1::Zeo<sup>r</sup> arg4 his4</i>      | Tamura et al., 2010    |
| PAZ6        | <i>atg2Δ</i>                            | <i>Δatg2::Zeo<sup>r</sup> arg4 his4</i>      | Mukaiyama et al., 2002 |
| PZO101      | <i>atg26Δ</i>                           | <i>Δatg26::Zeo<sup>r</sup> arg4 his4</i>     | Oku et al., 2003       |
| NTP0201     | YFP-ATG8 <i>atg2Δ</i>                   | PAZ6 <i>arg4::pSAP115 his4</i>               | This study             |
| NTP2601     | YFP-ATG8 <i>atg26Δ</i>                  | PZO101 <i>arg4::pSAP115 his4</i>             | This study             |
| NTP1801     | <i>atg18Δ</i>                           | <i>Δatg18::Zeo<sup>r</sup> arg4 his4</i>     | This study             |
| NTP1802     | <i>fab1Δ</i>                            | <i>Δfab1::Zeo<sup>r</sup> arg4 his4</i>      | This study             |
| NTP1803     | <i>vac14Δ</i>                           | <i>Δvac14::Zeo<sup>r</sup> arg4 his4</i>     | This study             |
| NTP1804     | <i>yck3Δ</i>                            | <i>Δyck3::Zeo<sup>r</sup> arg4 his4</i>      | This study             |
| NTP1805     | <i>hog1Δ</i>                            | <i>Δhog1::Zeo<sup>r</sup> arg4 his4</i>      | This study             |
| YAP0004     | YFP-ATG8 CFP-SKL PPY12                  | PPY12 <i>arg4::pSAP115 his4::pYA006</i>      | Ano et al., 2004       |
| NTP1806     | YFP-ATG8 CFP-SKL <i>atg18Δ</i>          | YAP004 <i>Δatg18::Zeo<sup>r</sup></i>        | This study             |
| NTP1807     | YFP-ATG8 CFP-SKL <i>atg2Δ</i>           | PAZ6 <i>arg4::pSAP115 his4::pYA006</i>       | This study             |
| NTP1808     | YFP-ATG8 CFP-SKL <i>fab1Δ</i>           | YAP004 <i>Δfab1::Zeo<sup>r</sup></i>         | This study             |
| NTP1809     | PGAPDH-GST-ATG18 SMD1163                | SMD1163 <i>Zeo<sup>r</sup>::pNT1815 his4</i> | This study             |
| NTP1810     | PGAPDH-GST-ATG18AA SMD1163              | SMD1163 <i>his4::pNT1813</i>                 | This study             |
| NTP1811     | PGAPDH-GST-ATG18DD SMD1163              | SMD1163 <i>his4::pNT1814</i>                 | This study             |
| NTP1812     | PATG18-ATG18-5xFLAG Wt <i>atg18Δ</i>    | NTP1801 <i>arg4::pNT1801 his4</i>            | This study             |
| NTP1813     | PATG18-ATG18-5xFLAG AA <i>atg18Δ</i>    | NTP1801 <i>arg4::pNT1802 his4</i>            | This study             |
| NTP1814     | PATG18-ATG18-5xFLAG DD <i>atg18Δ</i>    | NTP1801 <i>arg4::pNT1803 his4</i>            | This study             |
| NTP1815     | PATG18-ATG18-5xFLAG AS <i>atg18Δ</i>    | NTP1801 <i>arg4::pNT1804 his4</i>            | This study             |
| NTP1816     | PATG18-ATG18-5xFLAG SA <i>atg18Δ</i>    | NTP1801 <i>arg4::pNT1805 his4</i>            | This study             |
| NTP1817     | PATG18-ATG18-5xFLAG DS <i>atg18Δ</i>    | NTP1801 <i>arg4::pNT1806 his4</i>            | This study             |
| NTP1818     | PATG18-ATG18-5xFLAG SD <i>atg18Δ</i>    | NTP1801 <i>arg4::pNT1807 his4</i>            | This study             |
| NTP1819     | YFP-ATG8 <i>atg18Δ</i>                  | NTP1801 <i>his4::pNT1812 arg4</i>            | This study             |
| NTP1820     | YFP-ATG8 ATG18-5xFLAG Wt <i>atg18Δ</i>  | NTP1819 <i>arg4::pNT1801</i>                 | This study             |
| NTP1821     | YFP-ATG8 ATG18-5xFLAG AA <i>atg18Δ</i>  | NTP1819 <i>arg4::pNT1802</i>                 | This study             |
| NTP1822     | YFP-ATG8 ATG18-5xFLAG DD <i>atg18Δ</i>  | NTP1819 <i>arg4::pNT1803</i>                 | This study             |
| NTP1823     | PATG18-ATG18-YFP Wt <i>atg18Δ</i>       | NTP1801 <i>arg4::pNT1808 his4</i>            | This study             |
| NTP1824     | PATG18-ATG18-YFP AA <i>atg18Δ</i>       | NTP1801 <i>arg4::pNT1809 his4</i>            | This study             |
| NTP1825     | PATG18-ATG18-YFP DD <i>atg18Δ</i>       | NTP1801 <i>arg4::pNT1810 his4</i>            | This study             |
| NTP1826     | PATG18-ATG18-YFP Wt <i>fab1Δ</i>        | NTP1802 <i>arg4::pNT1808 his4</i>            | This study             |
| NTP1827     | PATG18-ATG18-5xFLAG <i>atg1Δ</i>        | NTP0101 <i>arg4::pNT1801 his4</i>            | This study             |
| NTP1828     | PATG18-ATG18-5xFLAG <i>atg2Δ</i>        | NTP0101 <i>arg4::pNT1801 his4</i>            | This study             |
| NTP1829     | PATG18-ATG18-5xFLAG <i>yck3Δ</i>        | NTP1804 <i>arg4::pNT1801 his4</i>            | This study             |
| NTP1830     | PATG18-ATG18-5xFLAG <i>hog1Δ</i>        | NTP1805 <i>arg4::pNT1801 his4</i>            | This study             |
| NTP1831     | PACT1-CFP-ATG18 YFP-ATG8 PPY12          | PPY12 <i>arg4::pSAP115 his4::pNT1811</i>     | This study             |
| NTP1832     | PATG18-ATG18-5xFLAG S387A <i>atg18Δ</i> | NTP1801 <i>arg4::pNT1817 his4</i>            | This study             |
| NTP1833     | PATG18-ATG18-5xFLAG S388A <i>atg18Δ</i> | NTP1801 <i>arg4::pNT1818 his4</i>            | This study             |
| NTP1834     | PATG18-ATG18-5xFLAG T389A <i>atg18Δ</i> | NTP1801 <i>arg4::pNT1819 his4</i>            | This study             |
| NTP1835     | PATG18-ATG18-5xFLAG T390A <i>atg18Δ</i> | NTP1801 <i>arg4::pNT1820 his4</i>            | This study             |
| NTP1836     | PATG18-ATG18-5xFLAG S391A <i>atg18Δ</i> | NTP1801 <i>arg4::pNT1821 his4</i>            | This study             |
| NTP1837     | PATG18-ATG18-5xFLAG S492A <i>atg18Δ</i> | NTP1801 <i>arg4::pNT1822 his4</i>            | This study             |
| NTP1839     | PATG18-ATG18-5xFLAG S493A <i>atg18Δ</i> | NTP1801 <i>arg4::pNT1823 his4</i>            | This study             |
| NTP1840     | PATG18-ATG18-5xFLAG T494A <i>atg18Δ</i> | NTP1801 <i>arg4::pNT1824 his4</i>            | This study             |
| NTP1841     | PATG18-ATG18-5xFLAG S495A <i>atg18Δ</i> | NTP1801 <i>arg4::pNT1825 his4</i>            | This study             |
| NTP1842     | PGAPDH-GST-ATG18AS <i>atg18Δ</i>        | NTP1801 <i>his4::pNT1826 arg4</i>            | This study             |
| NTP1843     | PGAPDH-GST-ATG18SA <i>atg18Δ</i>        | NTP1801 <i>his4::pNT1827 arg4</i>            | This study             |
| NTP0202     | PACT1-CFP-ATG18 YFP-ATG8 <i>atg2Δ</i>   | PAZ6 <i>arg4::pSAP115 his4::pNT1811</i>      | This study             |
| NTP2602     | PACT1-CFP-ATG18 YFP-ATG8 <i>atg26Δ</i>  | PZO101 <i>arg4::pSAP115 his4::pNT1811</i>    | This study             |

Table S2. Oligonucleotides used in this study

| Designation             | DNA sequence                                                       |
|-------------------------|--------------------------------------------------------------------|
| FLAGORF(+ATG)FwXhoI     | 5'-CCGCTCGAGATCCCCGGGTTAATTAATCATATGGACTAC-3'                      |
| FLAGORF(+TGA)RvPstI     | 5'-AACTGCAGTCATAAATCATAAGAAAATTCGCTTATTAGAAGTGGCG-3'               |
| PpATG18promoterFwBamHI  | 5'-CGGGATCCCATCATTACGTGTAGGTCAGCACAC-3'                            |
| PpATG18ORF(-TAA)RvXhoI  | 5'-CCGCTCGAGCCCGTCATTGACATCAGTCAGCA-3'                             |
| PpATG18ORF(-ATG)FwBamHI | 5'-CGGGATCCTCGCAACCTACAGATGAGGCT-3'                                |
| PpATG18 ST387-391AFw    | 5'-GTTAACGGTGCCTAGAAGGGTAGCCGCAGCCGCCGCTCTTGGCTCATATGGAAGTCAAG-3'  |
| PpATG18 ST387-391ARv    | 5'-CTTGACTTCCATATGAGCCAAGAGCGGGCTGCGGCTACCCCTTAGGCACCGTTAAC-3'     |
| PpATG18 ST387-391DFw    | 5'-GTTAACGGTGCCTAGAAGGGTAGACGAAGACGACGATCTTGGCTCATATGGAAGTCAAG-3'  |
| PpATG18 ST387-391DRv    | 5'-CTTGACTTCCATATGAGCCAAGATCGTCTCGTCTTCCCTTCTAGGCACCGTTAAC-3'      |
| PpATG18 ST491-495AFw    | 5'-GATGTCGACAATGCTGCTGCCGCTGCTGATTCCACCTTTCATCAAAAAGCTTCTTCATGT-3' |
| PpATG18 ST491-495ARv    | 5'-AAAGGTGGAATCAGCAGCGGCAGCAGCATTGTCGACATCTTCGTGCTCACCCAATTGAAG-3' |
| PpATG18 ST491-495DFw    | 5'-GATGTCGACAATGAGGATGACGAGGAGGATTCCACCTTTCATCAAAAAGCTTCTTCATGT-3' |
| PpATG18 ST491-495DRv    | 5'-AAAGGTGGAATCCTCCTCGTCATCCTCATTGTCGACATCTTCGTGCTCACCCAATTGAAG-3' |
| PpATG18 S387AFw         | 5'-AGGGTAGCCTCAACCACCTCTCTTGGC-3'                                  |
| PpATG18 S387ARv         | 5'-GGTTGAGGCTACCCCTTAGGCACCGT-3'                                   |
| PpATG18 S388AFw         | 5'-GTATCCGCTACCACCTCTCTTGGCTCA-3'                                  |
| PpATG18 S388ARv         | 5'-GGTGGTAGCGGATACCCCTTAGGCAC-3'                                   |
| PpATG18 T389AFw         | 5'-TCCTCAGCCACCTCTCTTGGCTCATAT-3'                                  |
| PpATG18 T389ARv         | 5'-AGAGGTGGCTGAGGATACCCCTTAGG-3'                                   |
| PpATG18 T390AFw         | 5'-TCAACCGCCTCTCTTGGCTCATATGGA-3'                                  |
| PpATG18 T390ARv         | 5'-AAGAGAGGCGGTTGAGGATACCCCTTCT-3'                                 |
| PpATG18 S391AFw         | 5'-ACCACCGCTCTTGGCTCATATGGAAGT-3'                                  |
| PpATG18 S391ARv         | 5'-GCCAAGAGCGGTGGTTGAGGATACCCCT-3'                                 |
| PpATG18 S492AFw         | 5'-AATTGGCTAGCACGTCGGATTCCACC-3'                                   |
| PpATG18 S492ARv         | 5'-CGTGCTAGCCGAATTGTCGACATCTTC-3'                                  |
| PpATG18 S493AFw         | 5'-TCGAGTGCCACGTCGGATTCCACCTT-3'                                   |
| PpATG18 S493ARv         | 5'-CGACGTGGCACTCGAATTGTCGACATC-3'                                  |
| PpATG18 T494AFw         | 5'-AGTAGCGCCTCGGATTCCACCTTTCAT-3'                                  |
| PpATG18 T494ARv         | 5'-ATCCGAGGCGCTACTCGAATTGTCGAC-3'                                  |
| PpATG18 S495AFw         | 5'-AGCACGGCCGATTCCACCTTTCATCA-3'                                   |
| PpATG18 S495ARv         | 5'-GGAATCGCCGTGCTACTCGAATTGTC-3'                                   |
| PpATG18FTTGFw           | 5'-GGTGTCAAATGTATCAGTTCACAACAGGCACCTACCCACAAAAGATC-3'              |
| PpATG18FTTGRv           | 5'-GATCTTTGTGGGGTAAGTGCCTGTTGTGAACGATACAATTTGACACC-3'              |
| pDVATG18UPFw            | 5'-CGGGATCCTTAACTGGGTTACGACATCATTACGT-3'                           |
| pDVATG18UPRv            | 5'-GGGGTACCTAGATGGTTATCTGAATGGTATTTGTAAGGA-3'                      |
| pDVATG18DWFw            | 5'-TCCCCGCGGAAAAAATAAACTAGCAGCCGGCGG-3'                            |
| pDVATG18DWRv            | 5'-CGGGATCCCTGAGAGACAGTTTTTTAATTGGCATG-3'                          |
| pDVFAB1UPFw             | 5'-GGAATCCGAATTGATGAAACAGCAAACATTGTCAC-3'                          |
| pDVFAB1UPRv             | 5'-CCGCTCGAGAGATGGATAAATACACAGGTGAAATGAATC-3'                      |
| pDVFAB1DWFw             | 5'-CGGGATCCACATTCTCTTTTTTTTTCAGAG-3'                               |
| pDVFAB1DWRv             | 5'-GGAATCCATCCATATTAGTAAATCATCGTTCAGATT-3'                         |
| pDVVAC14UPFw            | 5'-CGGGATCCTCATCCGACTGTGATGCCTTGAAC-3'                             |
| pDVVAC14UPRv            | 5'-GGAATCTGTGTTGGTGGGACGGAGGTGT-3'                                 |
| pDVVAC14DWFw            | 5'-GGAATTCAGTATAGTGTATGCTGTCCGAAAC-3'                              |
| pDVVAC14DWRv            | 5'-CCGCTCGAGGAAGCTAGCCCAATTGGAACAGTCG-3'                           |
| pDVYCK3UPFw             | 5'-CGGGATCCTGAGACTGGAAGTGTGAGACTTCA-3'                             |
| pDVYCK3UPRv             | 5'-GGAATTCGGTTTATAGTCCCTGCAATATCGTAC-3'                            |
| pDVYCK3DWFw             | 5'-GGAATTCGTTTTTCCACTACGGAGTTAATTC-3'                              |
| pDVYCK3DWRv             | 5'-CCGCTCGAGTGCAAATATCCTTCACTGGGTGCCG-3'                           |

## References

- Ano, Y., T. Hattori, M. Oku, H. Mukaiyama, M. Baba, Y. Ohsumi, N. Kato, and Y. Sakai. 2005. A sorting nexin PpAtg24 regulates vacuolar membrane dynamics during pexophagy via binding to phosphatidylinositol-3-phosphate. *Mol. Biol. Cell.* 16:446–457. <http://dx.doi.org/10.1091/mbc.E04-09-0842>
- Mukaiyama, H., M. Oku, M. Baba, T. Samizo, A.T. Hammond, B.S. Glick, N. Kato, and Y. Sakai. 2002. Paz2 and 13 other PAZ gene products regulate vacuolar engulfment of peroxisomes during micropexophagy. *Genes Cells.* 7:75–90. <http://dx.doi.org/10.1046/j.1356-9597.2001.00499.x>
- Oku, M., D. Warnecke, T. Noda, F. Müller, E. Heinz, H. Mukaiyama, N. Kato, and Y. Sakai. 2003. Peroxisome degradation requires catalytically active sterol glucosyltransferase with a GRAM domain. *EMBO J.* 22:3231–3241. <http://dx.doi.org/10.1093/emboj/cdg331>
- Sakai, Y., A. Koller, L.K. Rangell, G.A. Keller, and S. Subramani. 1998. Peroxisome degradation by microautophagy in *Pichia pastoris*: identification of specific steps and morphological intermediates. *J. Cell Biol.* 141:625–636. <http://dx.doi.org/10.1083/jcb.141.3.625>
- Tamura, N., M. Oku, and Y. Sakai. 2010. Atg8 regulates vacuolar membrane dynamics in a lipidation-independent manner in *Pichia pastoris*. *J. Cell Sci.* 123:4107–4116. <http://dx.doi.org/10.1242/jcs.070045>
- Tuttle, D.L., and W.A. Dunn Jr. 1995. Divergent modes of autophagy in the methylotrophic yeast *Pichia pastoris*. *J. Cell Sci.* 108:25–35.
- Yamashita, S., H. Yurimoto, D. Murakami, M. Yoshikawa, M. Oku, and Y. Sakai. 2009. Lag-phase autophagy in the methylotrophic yeast *Pichia pastoris*. *Genes Cells.* 14:861–870. <http://dx.doi.org/10.1111/j.1365-2443.2009.01316.x>
